# Supplementary material for: Fabrication of high-toughness PEDOT:PSS-based conductive hydrogel strain/temperature sensors
Source: Royal Society of Chemistry journal article supplement (doi:10.1039/d5ra07790g), 2026-01-01
Supplement: d5ra07790g1.pdf [file d5ra07790g1.pdf]

Supporting information can be found in the Mendeley Repository.

wang, chenxiao (2025), “Supplementary Data”, Mendeley Data, V1, [doi: 10.17632/7bxgcgsyd5.1](https://doi.org/10.17632/7bxgcgsyd5.1)
